# Supplementary material
Source: publisher figshare collection journal article supplement (https://acs.figshare.com/ndownloader/files/3829993)
Supplement: Supplementary file 1 [file 3829993]

## **Supporting information**

# **Optical sensor nanoparticles in artificial sediments – a new tool to visualize O<sub>2</sub> dynamics around the rhizome and roots of seagrasses and other aquatic macrophytes**

Klaus Koren<sup>a†\*</sup>, Kasper E. Brodersen<sup>b†</sup>, Sofie L. Jakobsen<sup>a</sup>, Michael Kühl<sup>a,b,c\*</sup>

a Marine Biological Section, Department of Biology, University of Copenhagen, Helsingør, Denmark

b Plant Functional Biology and Climate Change Cluster, University of Technology Sydney, Australia

c Singapore Centre on Environmental Life Sciences Engineering, School of Biological Sciences, Nanyang Technological University, Singapore

ratio red channel/green channel

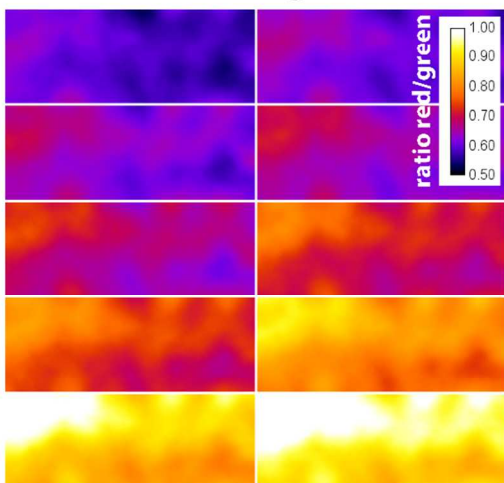

O<sub>2</sub> concentration image

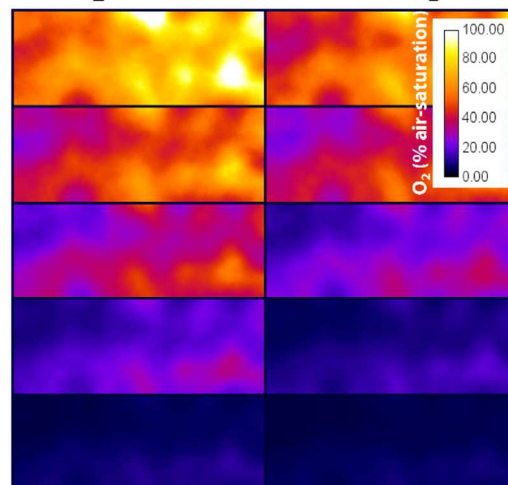

calibration function

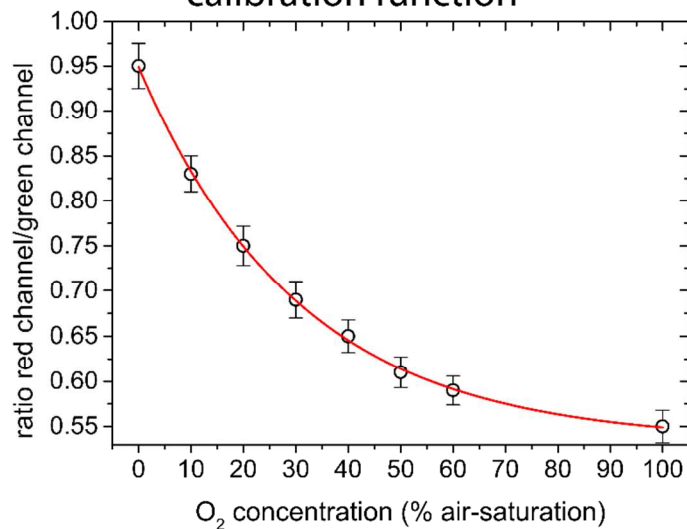

Supporting Figure 1: Visualization of the calibration process.

Acquired images were split into red, green, and blue channels and analyzed using the freely available software ImageJ (<http://rsbweb.nih.gov/ij/>). In order to obtain O<sub>2</sub> concentration images the following steps were performed: First the red channel (O<sub>2</sub> sensitive emission of PtTFPP) and green channel (emission of the reference dye MY) images were divided using the ImageJ plugin Ratio Plus (<http://rsb.info.nih.gov/ij/plugins/ratio-plus.html>). This resulted in images as shown in the top left panel. For the calibration, the obtained ratio images were correlated to the measured O<sub>2</sub> levels in the water column. There different regions were measured and used to generate the calibration plot. This calibration curve was then used to convert ratio images to an O<sub>2</sub> concentration images (top right).

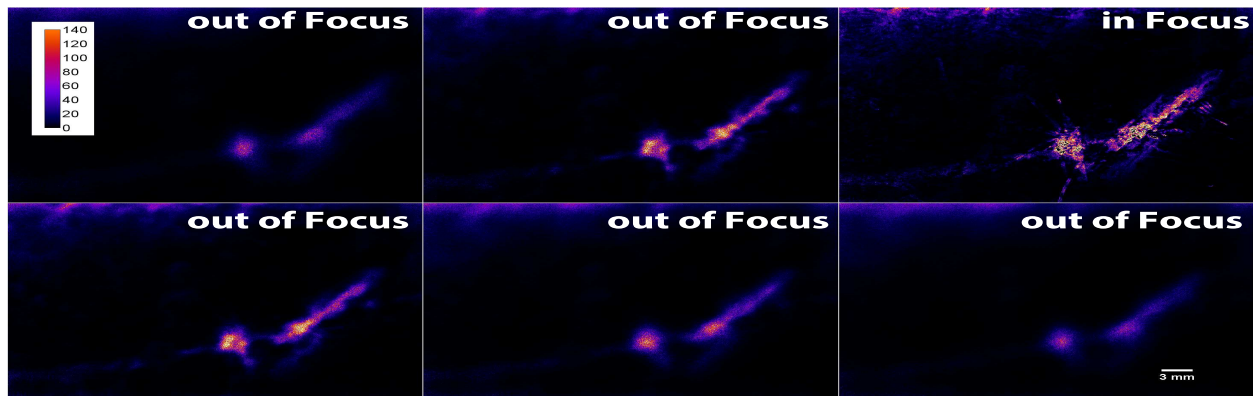

Supporting Figure 2: O<sub>2</sub> concentration images (scale in % air saturation) recorded in focus with the rhizome and out of focus. It can be seen that in the focal plane of the rhizome the greatest level of detail can be obtained. Out of focus the picture gets blurry and only parts of the structures can be visualized.

For planar optrodes, this can be a resolution limiting factor as close contact of the rhizome to the optrode is needed.
